# Supplementary material
Source: PubMed Central journal article supplement (PMC3098115)
Supplement: NIHMS287130-supplement-1_si_001.pdf [file NIHMS287130-supplement-1_si_001.pdf]

# S<sub>P</sub> Hybrid

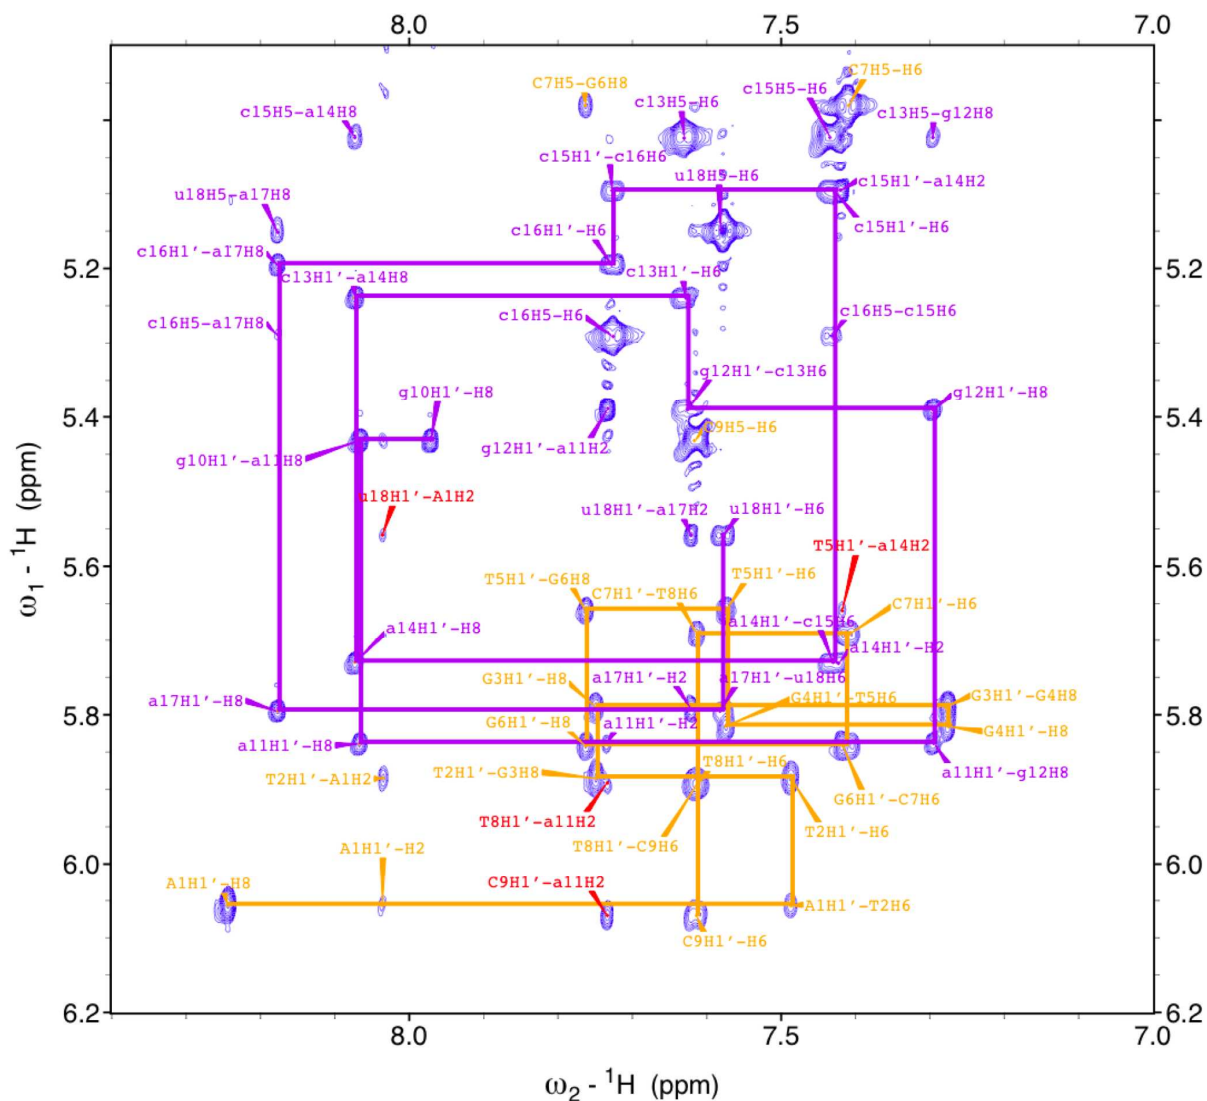

## S1 B

**S1:** 150 ms NOESY base (H6/H8) to sugar (H1') pathway for R<sub>P</sub> hybrid (A) and S<sub>P</sub> hybrid (B). DNA pathways and cross peaks shown in orange. RNA pathways and cross peaks shown in purple. Inter-strand cross peaks labeled in red. Sample conditions: ~1.0 mM duplex 10 mM sodium phosphate, 100 mM NaCl, 0.1 mM EDTA, pH\* 6.6, 298 K, <sup>1</sup>H referenced to DSS.

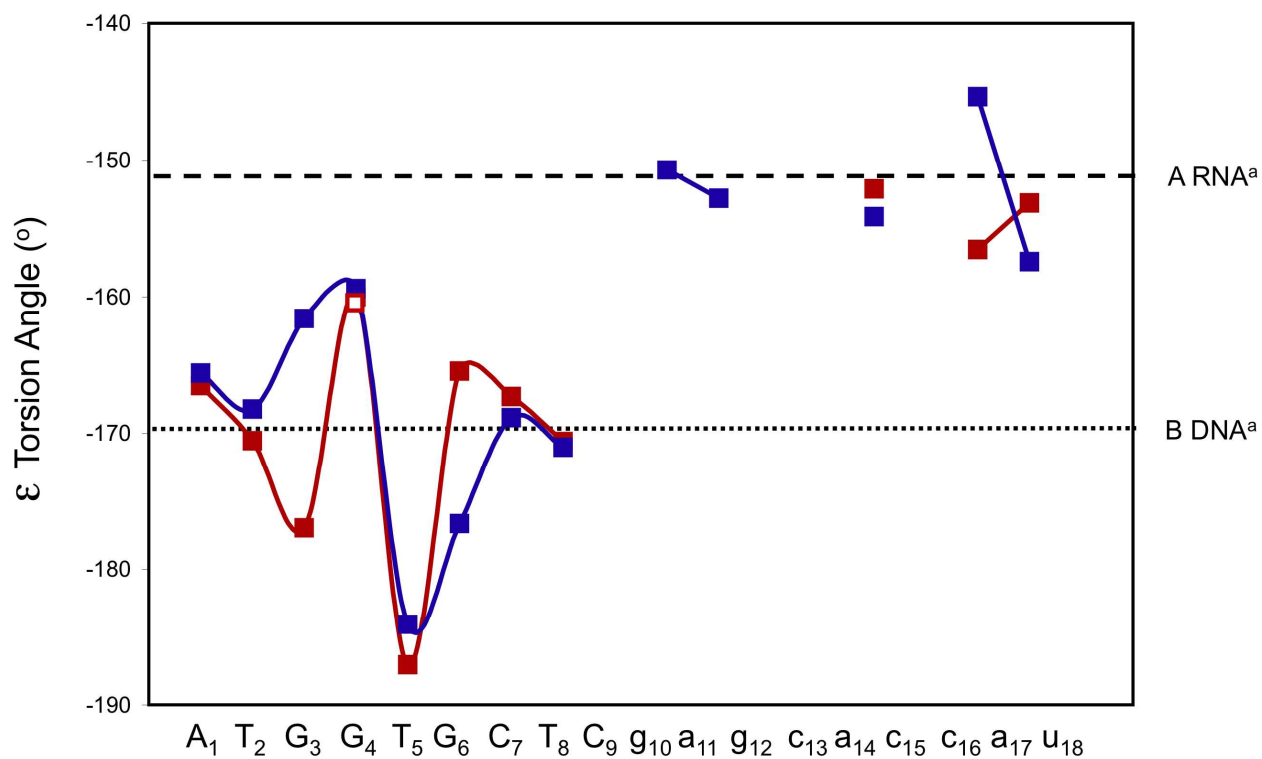

**S2:** ■ ε torsion angles for R<sub>P</sub> hybrid, ■ ε torsion angles for S<sub>P</sub> hybrid. □ Data not available, value measured from final NMR structure. <sup>a</sup> Values from Blackburn, Nucleic Acids in Chemistry and Biology 3<sup>rd</sup> edition.

## Aligned Peaks

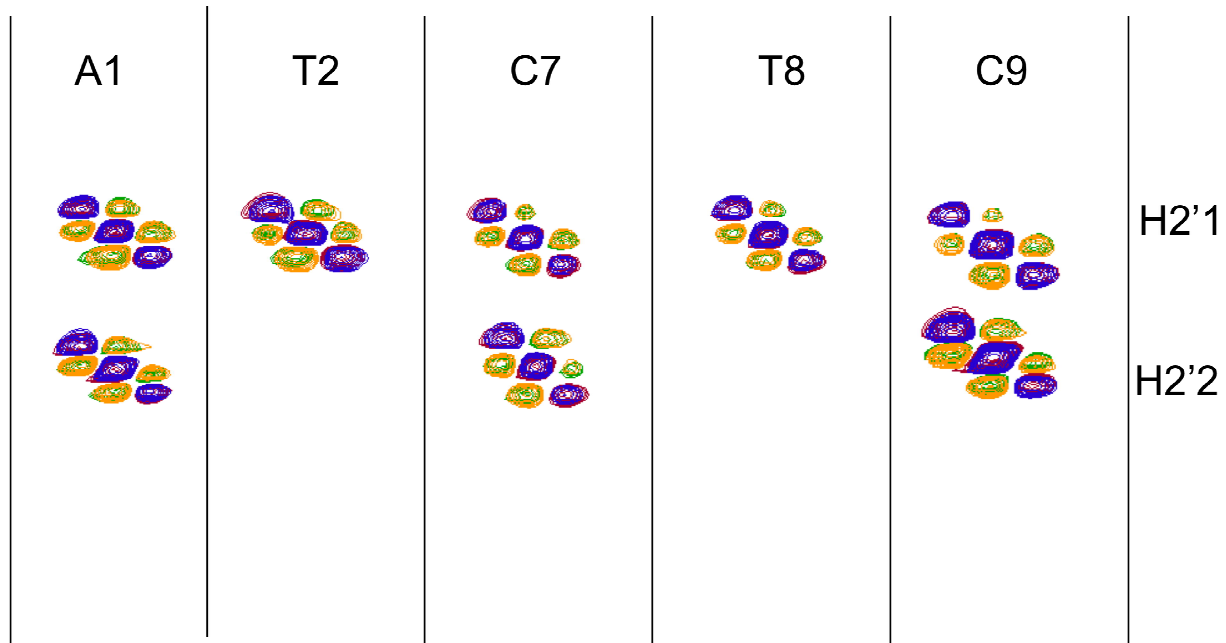

**S3:**  $\{^{31}\text{P}\}$  Low flip angle COSY. DNA  $\text{H1}'\text{-H2}'1$  and  $\text{H1}'\text{-H2}'2$  cross peaks at the ends of each duplex are shown.  $R_P$  hybrid cross peaks shown in red and green,  $S_P$  hybrid cross peaks in yellow and blue. Aligning each set of cross peaks reveals that  $^3J_{\text{H1}'\text{-H2}'1}$ ,  $^3J_{\text{H1}'\text{-H2}'2}$ , and  $\sum J_{\text{H1}'}$  are identical.

R<sub>p</sub> Hybrid

|     | H1'   | H2/H5/CH <sub>3</sub> | H2'1  | H2'2  | H3'   | H4'   | H6/H8 | <sup>13</sup> C1' | <sup>13</sup> C6 / <sup>13</sup> C8 | <sup>31</sup> P | NH <sup>a</sup> | <sup>11</sup> B | BH <sub>3</sub> |
|-----|-------|-----------------------|-------|-------|-------|-------|-------|-------------------|-------------------------------------|-----------------|-----------------|-----------------|-----------------|
| A1  | 6.259 | 8.039                 | 2.727 | 2.843 | 4.874 | 4.277 | 8.246 | 87.8              | 142.4                               | -               | -               | -               | -               |
| T2  | 6.087 | 1.489                 | 2.400 | 2.632 | 4.929 | 4.334 | 7.490 | 86.2              | 138.8                               | -0.513          | 13.766          | -               | -               |
| G3  | 5.990 | -                     | 2.717 | 2.717 | 4.879 | 4.410 | 7.758 | 85.1              | 137.7                               | -0.292          | 12.334          | -               | -               |
| G4  | 6.010 | -                     | 2.536 | 2.728 | 4.711 | 4.375 | 7.326 | 86.3              | 136.5                               | -0.111          | 13.078          | -               | -               |
| T5  | 6.002 | 1.265                 | 2.491 | 2.570 | 4.984 | 4.253 | 7.428 | 86.5              | 138.1                               | -0.749          | 13.708          | -41.43          | 0.33            |
| G6  | 5.984 | -                     | 2.634 | 2.634 | 4.720 | 4.349 | 7.677 | 85.8              | 137.3                               | 94.00           | 12.458          | -               | -               |
| C7  | 5.878 | 5.147                 | 2.320 | 2.579 | 4.601 | 4.260 | 7.420 | 87.8              | 141.8                               | -0.323          | -               | -               | -               |
| T8  | 6.095 | 1.503                 | 2.314 | 2.615 | 4.844 | 4.228 | 7.639 | 86.7              | 139.4                               | -0.942          | 14.030          | -               | -               |
| C9  | 6.270 | 5.630                 | 2.175 | 2.258 | 4.530 | 4.045 | 7.620 | 86.7              | 143.9                               | -0.446          | -               | -               | -               |
| g10 | 5.633 | -                     | 4.825 | -     | 4.626 | 4.342 | 7.973 | 91.8              | 138.8                               | -               | 12.488          | -               | -               |
| a11 | 6.039 | 7.736                 | 4.814 | -     | 4.750 | 4.553 | 8.065 | 92.5              | 140.0                               | -0.119          | -               | -               | -               |
| g12 | 5.581 | -                     | 4.449 | -     | 4.416 | 4.484 | 7.282 | 92.7              | 135.8                               | -0.23           | 13.294          | -               | -               |
| c13 | 5.421 | 5.219                 | 4.517 | -     | 4.495 | 4.417 | 7.602 | 93.7              | 140.5                               | -0.71           | -               | -               | -               |
| a14 | 5.921 | 7.433                 | 4.564 | -     | 4.664 | 4.483 | 8.073 | 92.9              | 139.3                               | -0.377          | -               | -               | -               |
| c15 | 5.340 | 5.242                 | 4.265 | -     | 4.341 | 4.563 | 7.505 | 93.7              | 140.6                               | -0.613          | -               | -               | -               |
| c16 | 5.405 | 5.504                 | 4.357 | -     | 4.538 | 4.263 | 7.740 | 94.8              | 141.1                               | -0.677          | -               | -               | -               |
| a17 | 5.996 | 7.625                 | 4.376 | -     | 4.717 | 4.468 | 8.182 | 92.4              | 140.0                               | -0.503          | -               | -               | -               |
| u18 | 5.759 | 5.352                 | 4.043 | -     | 4.177 | 4.378 | 7.579 | 91.6              | 142.5                               | -0.438          | 13.425          | -               | -               |

S<sub>p</sub> Hybrid

|     | H1'   | H2/H5/CH <sub>3</sub> | H2'1  | H2'2  | H3'   | H4'   | H6/H8 | <sup>13</sup> C1' | <sup>13</sup> C6 / <sup>13</sup> C8 | <sup>31</sup> P | NH <sup>a</sup> | <sup>11</sup> B | BH <sub>3</sub> |
|-----|-------|-----------------------|-------|-------|-------|-------|-------|-------------------|-------------------------------------|-----------------|-----------------|-----------------|-----------------|
| A1  | 6.256 | 8.036                 | 2.720 | 2.842 | 4.874 | 4.279 | 8.244 | 87.8              | 142.4                               | -               | -               | -               | -               |
| T2  | 6.085 | 1.489                 | 2.412 | 2.631 | 4.930 | 4.336 | 7.487 | 86.2              | 138.8                               | -0.520          | 13.733          | -               | -               |
| G3  | 5.990 | -                     | 2.764 | 2.688 | 4.848 | 4.404 | 7.749 | 85.3              | 137.7                               | -0.244          | 12.294          | -               | -               |
| G4  | 6.017 | -                     | 2.658 | 2.658 | 4.578 | 4.187 | 7.276 | 87.1              | 136.2                               | 0.082           | 13.143          | -               | -               |
| T5  | 5.860 | 1.241                 | 2.505 | 2.539 | 4.812 | 4.178 | 7.574 | 87.3              | 137.6                               | -0.938          | 13.948          | -42.11          | 0.42            |
| G6  | 6.042 | -                     | 2.629 | 2.629 | 4.807 | 4.359 | 7.763 | 86.1              | 137.2                               | 95.38           | 12.411          | -               | -               |
| C7  | 5.892 | 5.181                 | 2.308 | 2.575 | 4.626 | 4.259 | 7.412 | 87.6              | 141.8                               | -0.429          | -               | -               | -               |
| T8  | 6.093 | 1.508                 | 2.308 | 2.618 | 4.843 | 4.225 | 7.614 | 86.6              | 139.4                               | -0.925          | 14.024          | -               | -               |
| C9  | 6.270 | 5.630                 | 2.175 | 2.256 | 4.530 | 4.045 | 7.614 | 86.7              | 143.9                               | -0.463          | -               | -               | -               |
| g10 | 5.632 | -                     | 4.825 | -     | 4.626 | 4.340 | 7.972 | 92.0              | 138.7                               | -               | 12.494          | -               | -               |
| a11 | 6.039 | 7.733                 | 4.809 | -     | 4.750 | 4.558 | 8.067 | 92.6              | 139.9                               | -0.122          | -               | -               | -               |
| g12 | 5.590 | -                     | 4.431 | -     | 4.483 | 4.428 | 7.295 | 92.6              | 135.8                               | -0.238          | 13.302          | -               | -               |
| c13 | 5.439 | 5.222                 | 4.524 | -     | 4.515 | 4.415 | 7.630 | 93.7              | 140.6                               | -0.730          | -               | -               | -               |
| a14 | 5.931 | 7.421                 | 4.601 | -     | 4.658 | 4.494 | 8.073 | 92.9              | 139.3                               | -0.356          | -               | -               | -               |
| c15 | 5.296 | 5.223                 | 4.256 | -     | 4.318 | 4.378 | 7.431 | 93.9              | 140.5                               | -0.558          | -               | -               | -               |
| c16 | 5.395 | 5.490                 | 4.344 | -     | 4.543 | 4.292 | 7.727 | 94.0              | 141.1                               | -0.685          | -               | -               | -               |
| a17 | 5.995 | 7.620                 | 4.377 | -     | 4.717 | 4.469 | 8.177 | 92.4              | 140.0                               | -0.516          | -               | -               | -               |
| u18 | 5.759 | 5.350                 | 4.040 | -     | 4.174 | 4.374 | 7.579 | 91.7              | 142.5                               | -0.448          | 13.382          | -               | -               |

## DNA / RNA hybrid control

|     | H1'   | H2/H5/CH <sub>3</sub> | H2'1  | H2'2  | H3'   | H4'   | H6/H8 | NH     | <sup>31</sup> P |
|-----|-------|-----------------------|-------|-------|-------|-------|-------|--------|-----------------|
| A1  | 6.250 | 8.032                 | 2.723 | 2.840 | 4.868 | 4.273 | 8.242 | -      |                 |
| T2  | 6.086 | 1.478                 | 2.404 | 2.634 | 4.927 | 4.336 | 7.490 | nd     | -0.53           |
| G3  | 5.997 |                       | 2.720 | 2.720 | 4.869 | 4.409 | 7.754 | 12.290 | -0.29           |
| G4  | 6.006 |                       | 2.533 | 2.722 | 4.691 | 4.370 | 7.305 | 13.030 | -0.10           |
| T5  | 6.041 | 1.233                 | 2.416 | 2.637 | 4.877 | 4.280 | 7.410 | 13.630 | -0.81           |
| G6  | 5.949 |                       | 2.610 | 2.610 | 4.856 | 4.364 | 7.668 | 12.400 | -0.37           |
| C7  | 5.896 | 5.142                 | 2.296 | 2.581 | 4.592 | 4.274 | 7.381 | -      | -0.21           |
| T8  | 6.096 | 1.507                 | 2.307 | 2.619 | 4.846 | 4.228 | 7.608 | 13.890 | -0.91           |
| C9  | 6.263 | 5.624                 | 2.172 | 2.262 | 4.528 | 4.043 | 7.606 | -      | -0.46           |
| g10 | 5.592 |                       | 4.801 |       | 4.605 |       | 7.941 | nd     |                 |
| a11 | 6.018 | 7.713                 | 4.798 |       | 4.742 |       | 8.046 | -      | -0.14           |
| g12 | 5.585 |                       | 4.444 |       | 4.434 |       | 7.303 | 13.200 | -0.26           |
| c13 | 5.417 | 5.224                 | 4.506 |       | 4.508 |       | 7.628 | -      | -0.73           |
| a14 | 5.918 | 7.476                 | 4.589 |       | 4.665 |       | 8.082 | -      | -0.39           |
| c15 | 5.337 | 5.252                 | 4.262 |       | 4.338 |       | 7.507 | -      | -0.61           |
| c16 | 5.398 | 5.502                 | 4.361 |       | 4.536 |       | 7.735 | -      | -0.68           |
| a17 | 5.993 | 7.618                 | 4.376 |       | 4.716 |       | 8.174 | -      | -0.50           |
| u18 | 5.754 | 5.344                 | 4.038 |       | 4.173 |       | 7.571 | nd     | -0.45           |

**S4:** Chemical shifts for R<sub>P</sub> hybrid S<sub>P</sub> hybrid and Control hybrid. <sup>1</sup>H chemical shift assignments were determined for both duplexes from 2D NOESY pathways, with the assistance of 2D TOCSY and COSY experiments. Sugar H3' and H4' chemical shifts were used to assign the <sup>31</sup>P resonances via HPCOR experiments. Sample conditions are analogous to supporting information 1.

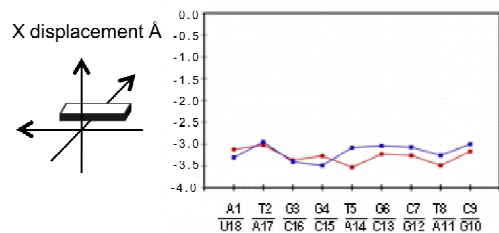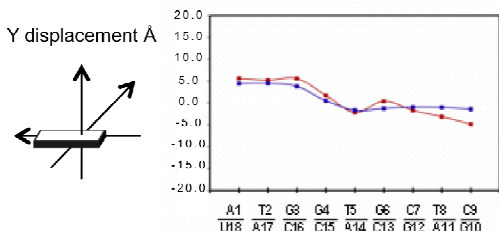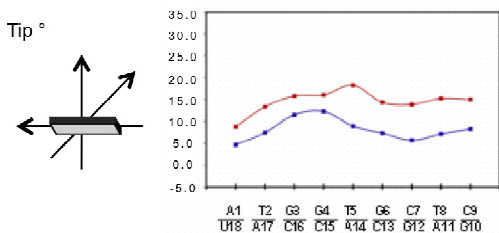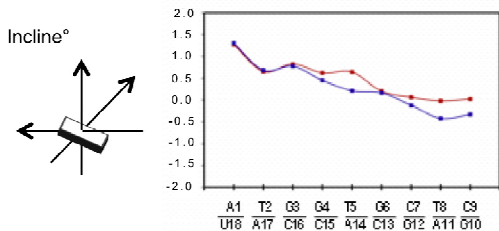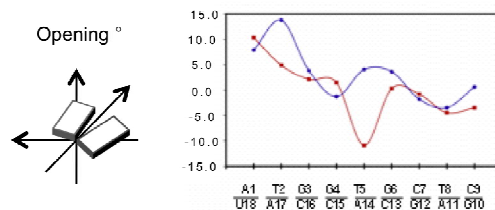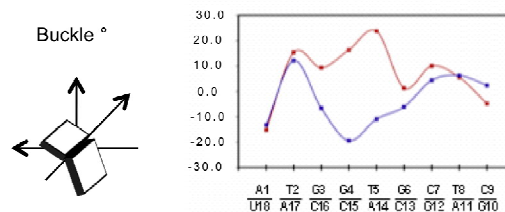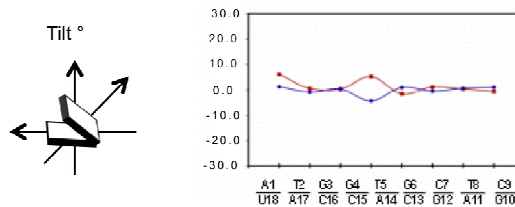

**S5:** Helical properties of the final NMR BH<sub>3</sub> modified DNA / RNA structures. R<sub>p</sub> hybrid value in red, S<sub>p</sub> hybrid values in blue. Structures are consistent with previously published DNA RNA hybrids. (19, 22)

### Sugar Puckering Summary

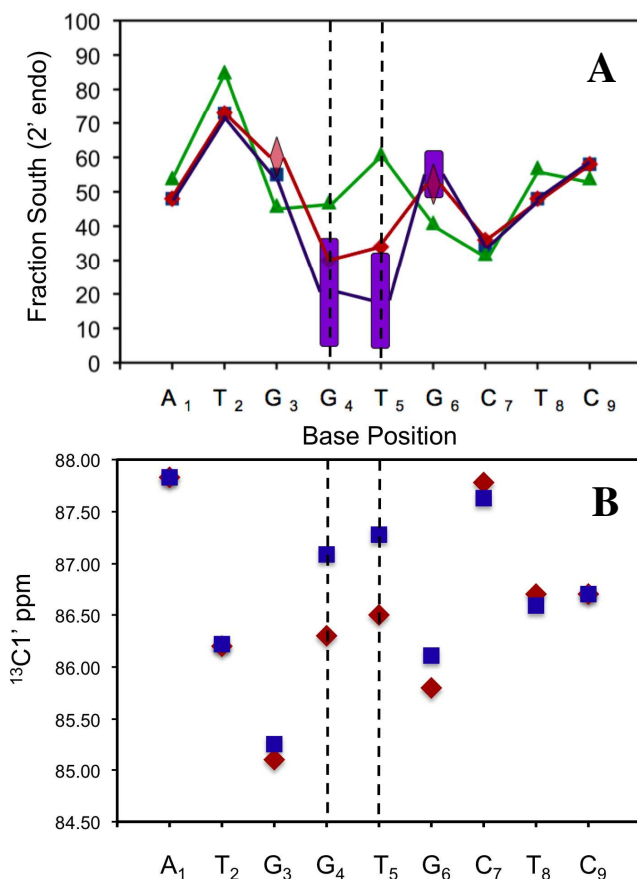

R<sub>p</sub> hybrid

| Base | F <sub>s</sub> | Chi  | Base - H1' | Base - H3' | Base - H4' | Estimated F <sub>s</sub> |
|------|----------------|------|------------|------------|------------|--------------------------|
| T2   | 73             | -108 | 6.00E+07   | 6.90E+07   | ol         |                          |
| T5   | 34             | -136 | ol         | 1.20E+08   | 3.00E+07   |                          |
| G3   |                | -143 | 4.80E+07   | 5.20E+07   | 2.00E+07   | ~ 58                     |
| G4   | 30             | -153 | 6.00E+07   | 6.00E+07   | 2.10E+07   |                          |
| G6   |                | -150 | 6.00E+07   | 7.10E+07   | 3.10E+07   | ~ 60                     |

C

S<sub>p</sub> hybrid

| Base | F <sub>s</sub> | Chi  | Base - H1' | Base - H3' | Base - H4' | Estimated F <sub>s</sub> |
|------|----------------|------|------------|------------|------------|--------------------------|
| T2   | 73             | -124 | 1.20E+07   | 1.60E+07   | 5.50E+06   |                          |
| T5   |                | -159 | 1.30E+07   | 3.70E+07   | 6.00E+06   | < 33                     |
| G3   | 55             | -146 | 1.00E+07   | 1.40E+07   | 6.00E+06   |                          |
| G4   |                | -152 | 1.20E+07   | 2.20E+07   | 2.80E+07   | < 38                     |
| G6   |                | -146 | 9.10E+06   | 1.50E+07   | 6.30E+06   | ~ 55                     |

D

**S6:** A) Summary of DNA sugar pucker (fraction south / 2' endo conformation) analysis. R<sub>p</sub> hybrid DNA dominant sugar pucker (■) and S<sub>p</sub> hybrid dominant DNA sugar pucker (■) derived from coupling constants using graphical method developed by (13) light color shaded rectangles and diamond ranges are estimated based on <sup>13</sup>C1' chemical shifts and NOESY intensities. Sugar pucker of an unmodified DNA RNA hybrid (▲) previously published (22)

B) <sup>13</sup>C1' chemical shifts for the R<sub>p</sub> hybrid (■) and S<sub>p</sub> hybrid (■).

C, D) Table of base (H8 / H6) to sugar (H1', H3', and H4') intensities. For the S<sub>p</sub> hybrid G<sub>6</sub> H8-H1' and H3'-H1' cross peaks have similar intensities and chi's as G<sub>3</sub>. For G<sub>4</sub>, H8-H3' and H8-H4' are more intense compared to the corresponding G<sub>3</sub> and G<sub>6</sub> cross peaks establishing a more favored N type pucker. This is also supported by a higher C1' chemical shift observed for G<sub>4</sub>. (Higher C1' ppm indicative of a more dominant N type sugar.) Comparing T<sub>5</sub> C1' to T<sub>2</sub> C1' and the R<sub>p</sub> T<sub>2</sub> C1' and T<sub>8</sub> C1' suggests the highest N population for T<sub>5</sub> among all thymine sugars. Additionally this is supported by the increase in T<sub>5</sub> H6-H3' intensity compared to S<sub>p</sub> T<sub>2</sub> and R<sub>p</sub> T<sub>2</sub> (compare ratio of H6-H3'/H6-H1' when looking between hybrids, R<sub>p</sub> T<sub>2</sub> ~ 1.2/1, S<sub>p</sub> T<sub>2</sub> ~ 1.25/1, S<sub>p</sub> T<sub>5</sub> ~ 1.8/1).

For the R<sub>p</sub> hybrid G<sub>3</sub> and G<sub>6</sub> have a lower C1' compared to G<sub>4</sub> indicating a more great N type population. With muddled trends observed in the cross peak intensities (significant amount of overlap) similar C1' chemical shifts for S<sub>p</sub> G<sub>3</sub> and G<sub>6</sub> suggest mixed populations with a possible slightly favored N conformation.



### Borano phosphate PARM-99 modification

A model borano phosphate linkage was built and stepwise minimized to the HF 6-31G\* level of theory in Gaussian; the charge derivation calculations were then completed utilizing the R.E.D. automation script which uses Gaussian (28) to calculate Molecular Electrostatic Potential (MEP) charges (HF 6-31G\*) and AMBER RESP to convert these to restrained electrostatic potentials. The structure was reoriented in 3D space 14 times with MEP & RESP values calculated for each conformation; all values were then averaged (29a,b). Early test systems which included sugar rings on each side of the linkage indicated that the charge distribution for the borano-phosphate linkage does not overly impact the charges outside of the phosphate group; as such the resulting RESP charges for the borano linkage were balanced to the overall parm99 nucleic acid phosphodiester group's charge. Within AMBER's ANTECHAMBER module, the BH3 atoms types were created using the calculated RESP charges and empirically determined B-P distances. ANTECHAMBER was used to calculate the B-H distances, angles, torsion angles, and force constants and generate the force-field modifications (26).

**S7:** Complete description of BH<sub>3</sub> parameters for structure derivation.

## Rp borano modified DNA / RNA hybrid residual dipolar splittings for final structure

| First atom  |     | Last atom |     | Calc. | Exp.    | Deviation   | penalty | distance |       |
|-------------|-----|-----------|-----|-------|---------|-------------|---------|----------|-------|
| C1'         | DA5 | 1 -- H1'  | DA5 | 1:    | -1.891  | -1.400      | -0.491  | 0.241    | 1.090 |
| C1'         | DT  | 2 -- H1'  | DT  | 2:    | 1.731   | 1.300       | 0.431   | 0.186    | 1.090 |
| C1'         | DG  | 4 -- H1'  | DG  | 4:    | -2.795  | -2.900      | 0.105   | 0.011    | 1.090 |
| C1'         | DT  | 5 -- H1'  | DT  | 5:    | 0.862   | 0.800       | 0.062   | 0.004    | 1.090 |
| C1'         | BGR | 6 -- H1'  | BGR | 6:    | 5.468   | 5.500       | -0.032  | 0.001    | 1.090 |
| C1'         | DC  | 7 -- H1'  | DC  | 7:    | 4.512   | 4.200       | 0.312   | 0.097    | 1.090 |
| C1'         | DT  | 8 -- H1'  | DT  | 8:    | 5.054   | 5.200       | -0.146  | 0.021    | 1.090 |
| C1'         | DC3 | 9 -- H1'  | DC3 | 9:    | 0.366   | 0.100       | 0.266   | 0.071    | 1.090 |
| C1'         | RG5 | 10 -- H1' | RG5 | 10:   | -5.867  | -6.300      | 0.433   | 0.188    | 1.090 |
| C1'         | RA  | 11 -- H1' | RA  | 11:   | -11.324 | -11.800     | 0.476   | 0.227    | 1.090 |
| C1'         | RG  | 12 -- H1' | RG  | 12:   | -10.466 | -10.400     | -0.066  | 0.004    | 1.090 |
| C1'         | RC  | 13 -- H1' | RC  | 13:   | -4.539  | -4.500      | -0.039  | 0.002    | 1.090 |
| C1'         | RA  | 14 -- H1' | RA  | 14:   | 1.123   | 1.500       | -0.377  | 0.142    | 1.090 |
| C1'         | RC  | 15 -- H1' | RC  | 15:   | 4.270   | 4.100       | 0.170   | 0.029    | 1.090 |
| C1'         | RC  | 16 -- H1' | RC  | 16:   | 6.413   | 6.400       | 0.013   | 0.000    | 1.090 |
| C1'         | RA  | 17 -- H1' | RA  | 17:   | 4.084   | 4.200       | -0.116  | 0.013    | 1.090 |
| C1'         | RU3 | 18 -- H1' | RU3 | 18:   | 1.484   | 1.000       | 0.484   | 0.234    | 1.090 |
| C8          | DA5 | 1 -- H8   | DA5 | 1:    | 5.216   | 5.200       | 0.016   | 0.000    | 1.090 |
| C6          | DT  | 2 -- H6   | DT  | 2:    | 2.054   | 2.400       | -0.346  | 0.119    | 1.090 |
| C8          | DG  | 3 -- H8   | DG  | 3:    | 2.676   | 1.800       | 0.876   | 0.767    | 1.090 |
| C8          | DG  | 4 -- H8   | DG  | 4:    | 3.468   | 3.300       | 0.168   | 0.028    | 1.090 |
| C6          | DT  | 5 -- H6   | DT  | 5:    | 9.551   | 9.900       | -0.349  | 0.122    | 1.090 |
| C8          | BGR | 6 -- H8   | BGR | 6:    | 10.362  | 9.800       | 0.562   | 0.316    | 1.090 |
| C6          | DC  | 7 -- H6   | DC  | 7:    | 5.661   | 6.000       | -0.339  | 0.115    | 1.090 |
| C6          | DT  | 8 -- H6   | DT  | 8:    | 1.717   | 1.900       | -0.183  | 0.033    | 1.090 |
| C6          | DC3 | 9 -- H6   | DC3 | 9:    | 4.785   | 5.500       | -0.715  | 0.511    | 1.090 |
| C8          | RG5 | 10 -- H8  | RG5 | 10:   | 2.256   | 2.400       | -0.144  | 0.021    | 1.090 |
| C8          | RA  | 11 -- H8  | RA  | 11:   | 4.079   | 5.200       | -1.121  | 1.257    | 1.090 |
| C8          | RG  | 12 -- H8  | RG  | 12:   | 3.859   | 2.700       | 1.159   | 1.343    | 1.090 |
| C6          | RC  | 13 -- H6  | RC  | 13:   | 9.374   | 9.500       | -0.126  | 0.016    | 1.090 |
| C8          | RA  | 14 -- H8  | RA  | 14:   | 6.670   | 6.500       | 0.170   | 0.029    | 1.090 |
| C6          | RC  | 15 -- H6  | RC  | 15:   | 6.149   | 5.900       | 0.249   | 0.062    | 1.090 |
| C6          | RC  | 16 -- H6  | RC  | 16:   | 4.328   | 3.800       | 0.528   | 0.279    | 1.090 |
| C8          | RA  | 17 -- H8  | RA  | 17:   | 3.060   | 3.100       | -0.040  | 0.002    | 1.090 |
| C6          | RU3 | 18 -- H6  | RU3 | 18:   | 2.906   | 3.400       | -0.494  | 0.244    | 1.090 |
| C2          | DA5 | 1 -- H2   | DA5 | 1:    | 6.504   | 6.200       | 0.304   | 0.093    | 1.090 |
| C2          | RA  | 11 -- H2  | RA  | 11:   | 1.681   | 1.400       | 0.281   | 0.079    | 1.090 |
| C2          | RA  | 14 -- H2  | RA  | 14:   | 7.739   | 7.500       | 0.239   | 0.057    | 1.090 |
| C2          | RA  | 17 -- H2  | RA  | 17:   | 4.102   | 3.800       | 0.302   | 0.091    | 1.090 |
| C5          | DC  | 7 -- H5   | DC  | 7:    | 9.202   | 7.800       | 1.402   | 0.161    | 1.090 |
| C5          | RC  | 15 -- H5  | RC  | 15:   | 9.298   | 10.700      | -1.402  | 0.162    | 1.090 |
| C5          | RC  | 16 -- H5  | RC  | 16:   | 9.519   | 10.800      | -1.281  | 0.079    | 1.090 |
| Total align |     |           |     |       |         | constraint: |         | 7.46     |       |

Sp borano modified DNA / RNA hybrid residual dipolar splittings for final structure

| First atom |     | Last atom |        | Calc. | Exp. | Deviation | penalty | distance |       |       |
|------------|-----|-----------|--------|-------|------|-----------|---------|----------|-------|-------|
| C1'        | DA5 | 1         | -- H1' | DA5   | 1:   | -0.308    | -0.700  | 0.392    | 0.154 | 1.090 |
| C1'        | DT  | 2         | -- H1' | DT    | 2:   | 7.435     | 7.400   | 0.035    | 0.001 | 1.090 |
| C1'        | DG  | 3         | -- H1' | DG    | 3:   | -0.788    | -0.900  | 0.112    | 0.012 | 1.090 |
| C1'        | DG  | 4         | -- H1' | DG    | 4:   | -5.398    | -5.500  | 0.102    | 0.010 | 1.090 |
| C1'        | DT  | 5         | -- H1' | DT    | 5:   | 0.035     | -0.100  | 0.135    | 0.018 | 1.090 |
| C1'        | BGS | 6         | -- H1' | BGS   | 6:   | 6.441     | 6.200   | 0.241    | 0.058 | 1.090 |
| C1'        | DC  | 7         | -- H1' | DC    | 7:   | 6.709     | 6.400   | 0.309    | 0.095 | 1.090 |
| C1'        | DT  | 8         | -- H1' | DT    | 8:   | 11.012    | 10.800  | 0.212    | 0.045 | 1.090 |
| C1'        | DC3 | 9         | -- H1' | DC3   | 9:   | 4.602     | 4.700   | -0.098   | 0.010 | 1.090 |
| C1'        | RG5 | 10        | -- H1' | RG5   | 10:  | -11.670   | -11.900 | 0.230    | 0.053 | 1.090 |
| C1'        | RA  | 11        | -- H1' | RA    | 11:  | -16.108   | -16.000 | -0.108   | 0.012 | 1.090 |
| C1'        | RG  | 12        | -- H1' | RG    | 12:  | -15.797   | -16.000 | 0.203    | 0.041 | 1.090 |
| C1'        | RC  | 13        | -- H1' | RC    | 13:  | -9.164    | -9.100  | -0.064   | 0.004 | 1.090 |
| C1'        | RA  | 14        | -- H1' | RA    | 14:  | -1.387    | -1.200  | -0.187   | 0.035 | 1.090 |
| C1'        | RC  | 15        | -- H1' | RC    | 15:  | 3.513     | 3.500   | 0.013    | 0.000 | 1.090 |
| C1'        | RC  | 16        | -- H1' | RC    | 16:  | 5.753     | 5.800   | -0.047   | 0.002 | 1.090 |
| C1'        | RA  | 17        | -- H1' | RA    | 17:  | 3.135     | 3.400   | -0.265   | 0.070 | 1.090 |
| C1'        | RU3 | 18        | -- H1' | RU3   | 18:  | 1.157     | 1.200   | -0.043   | 0.002 | 1.090 |
| C8         | DA5 | 1         | -- H8  | DA5   | 1:   | 9.124     | 9.100   | 0.024    | 0.001 | 1.090 |
| C6         | DT  | 2         | -- H6  | DT    | 2:   | 2.717     | 2.600   | 0.117    | 0.014 | 1.090 |
| C8         | DG  | 3         | -- H8  | DG    | 3:   | 5.188     | 5.700   | -0.512   | 0.262 | 1.090 |
| C8         | DG  | 4         | -- H8  | DG    | 4:   | 5.990     | 5.500   | 0.490    | 0.241 | 1.090 |
| C6         | DT  | 5         | -- H6  | DT    | 5:   | 14.252    | 15.400  | -1.148   | 1.317 | 1.090 |
| C8         | BGS | 6         | -- H8  | BGS   | 6:   | 15.920    | 15.600  | 0.320    | 0.102 | 1.090 |
| C6         | DC  | 7         | -- H6  | DC    | 7:   | 11.558    | 11.700  | -0.142   | 0.020 | 1.090 |
| C6         | DT  | 8         | -- H6  | DT    | 8:   | 6.057     | 6.200   | -0.143   | 0.020 | 1.090 |
| C6         | DC3 | 9         | -- H6  | DC3   | 9:   | 0.487     | 0.600   | -0.113   | 0.013 | 1.090 |
| C8         | RG5 | 10        | -- H8  | RG5   | 10:  | 5.012     | 5.600   | -0.588   | 0.345 | 1.090 |
| C8         | RA  | 11        | -- H8  | RA    | 11:  | 2.478     | 2.000   | 0.478    | 0.228 | 1.090 |
| C8         | RG  | 12        | -- H8  | RG    | 12:  | 9.806     | 9.800   | 0.006    | 0.000 | 1.090 |
| C6         | RC  | 13        | -- H6  | RC    | 13:  | 15.457    | 15.400  | 0.057    | 0.003 | 1.090 |
| C8         | RA  | 14        | -- H8  | RA    | 14:  | 14.693    | 14.200  | 0.493    | 0.243 | 1.090 |
| C6         | RC  | 15        | -- H6  | RC    | 15:  | 9.363     | 9.100   | 0.263    | 0.069 | 1.090 |
| C6         | RC  | 16        | -- H6  | RC    | 16:  | 6.160     | 6.700   | -0.540   | 0.291 | 1.090 |
| C8         | RA  | 17        | -- H8  | RA    | 17:  | 4.243     | 4.100   | 0.143    | 0.021 | 1.090 |
| C6         | RU3 | 18        | -- H6  | RU3   | 18:  | 5.258     | 5.400   | -0.142   | 0.020 | 1.090 |
| C2         | DA5 | 1         | -- H2  | DA5   | 1:   | 9.309     | 9.000   | 0.309    | 0.096 | 1.090 |
| C2         | RA  | 11        | -- H2  | RA    | 11:  | 3.370     | 3.400   | -0.030   | 0.001 | 1.090 |
| C2         | RA  | 14        | -- H2  | RA    | 14:  | 15.311    | 15.900  | -0.589   | 0.347 | 1.090 |
| C2         | RA  | 17        | -- H2  | RA    | 17:  | 6.138     | 6.000   | 0.138    | 0.019 | 1.090 |
| C5         | DC  | 7         | -- H5  | DC    | 7:   | 11.052    | 10.500  | 0.552    | 0.305 | 1.090 |
| C5         | DC3 | 9         | -- H5  | DC3   | 9:   | 9.959     | 10.000  | -0.041   | 0.002 | 1.090 |
| C5         | RC  | 13        | -- H5  | RC    | 13:  | 0.520     | 0.100   | 0.420    | 0.176 | 1.090 |
| C5         | RC  | 15        | -- H5  | RC    | 15:  | 15.408    | 15.000  | 0.408    | 0.167 | 1.090 |
| C5         | RC  | 16        | -- H5  | RC    | 16:  | 15.019    | 15.600  | -0.581   | 0.338 | 1.090 |

Total align constraint: 5.28

## S8B

**S8 A, B:** Table of RDC parameters for both modified hybrids. Calculated values (Calc.) were derived from the final structures using Amber 9.0. Experimental values (Exp.) are derived from the difference between measured couplings in the presence and absences of pf1 bacterial phase. Penalties were calculated by Amber 9.0 using a dwt of 1.0.

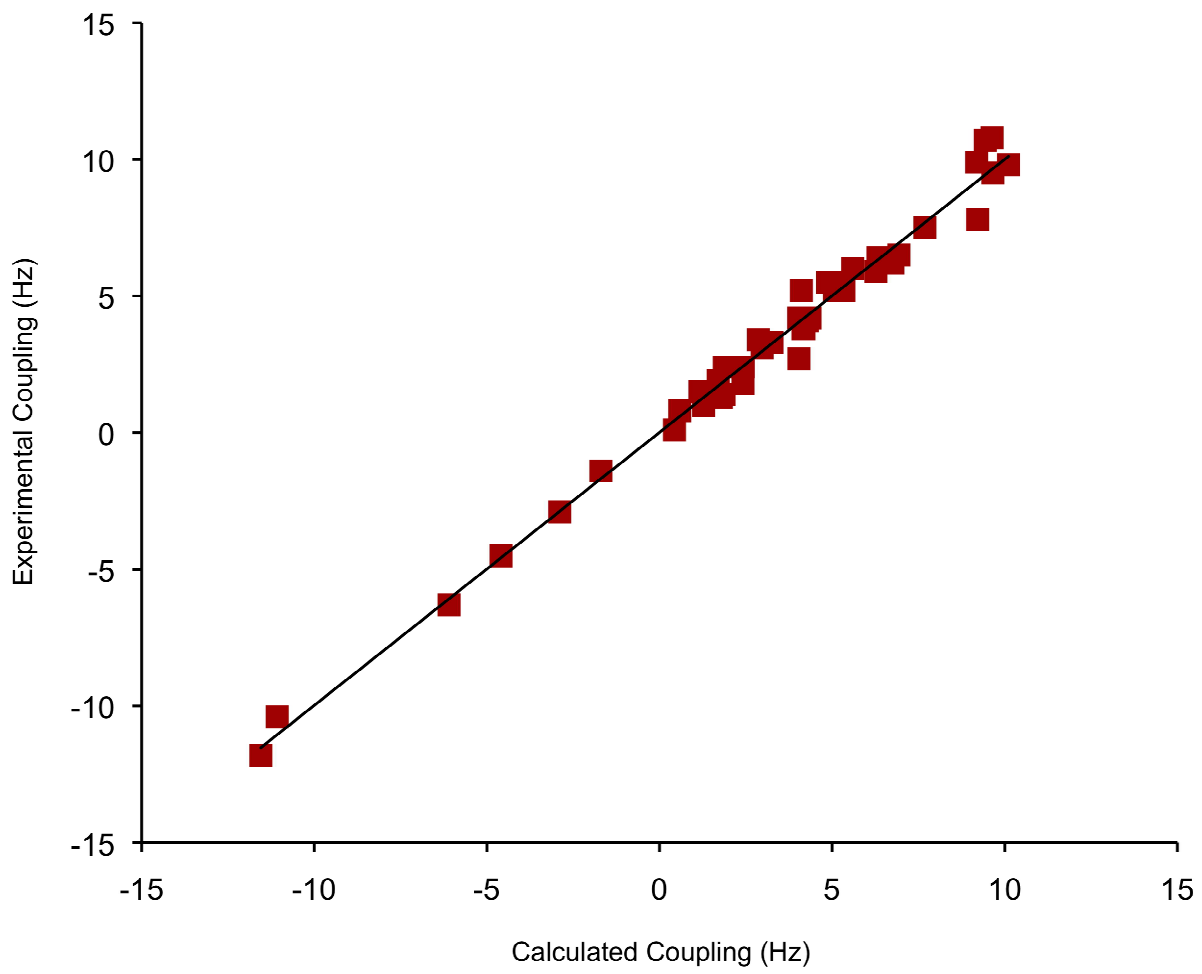

S8 C

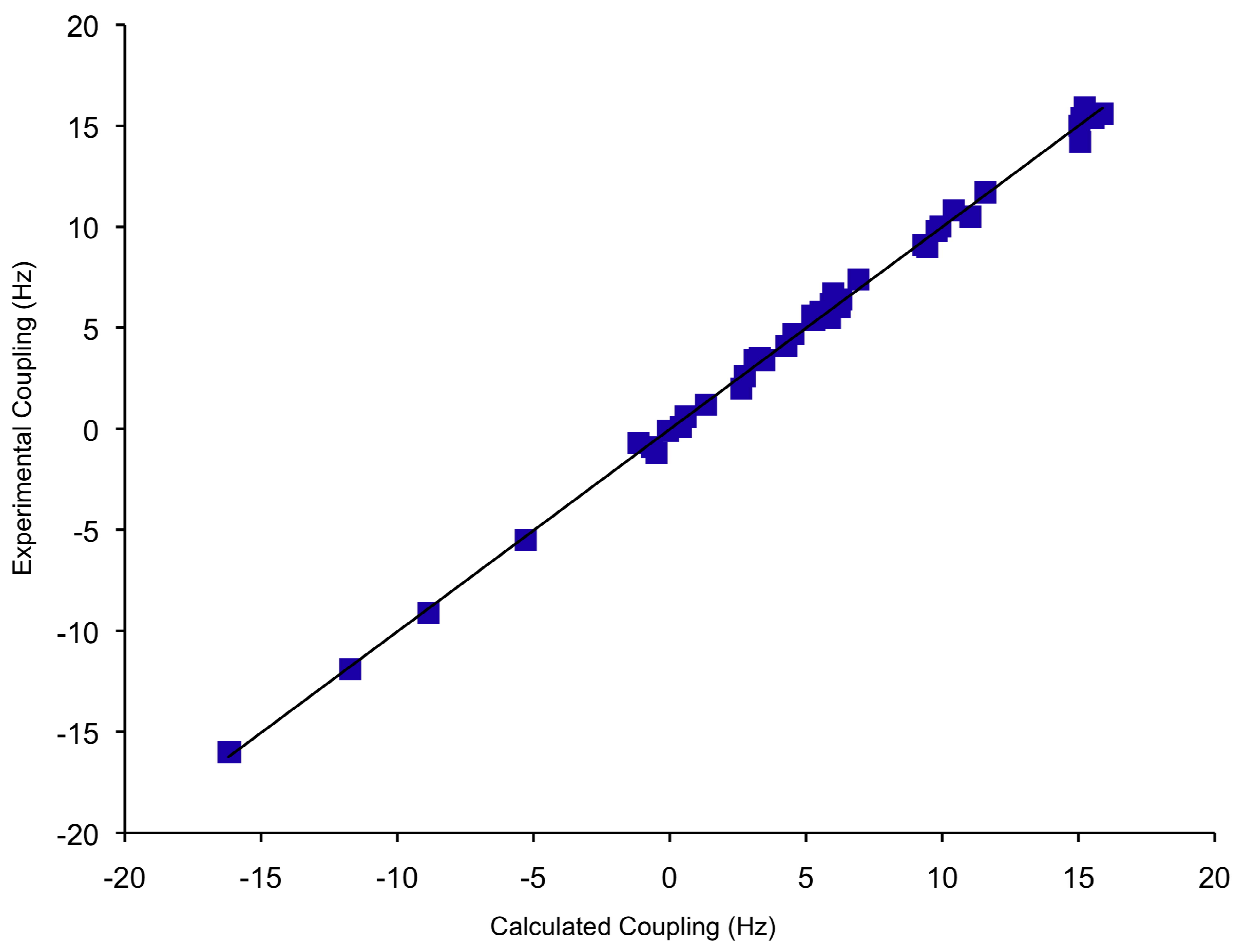

### S8 D

**S8 C,D:** Plot of back calculated RDC values using REDCAT vs. experimentally measured values.  $R^2$  values for  $R_P$  hybrid 0.987 (C), and  $S_P$  hybrid 0.998 (D).
